## MAINTENANCE OF OXYGEN CONSUMPTION IN RESTING *SILURUS GLANIS* AT DIFFERENT LEVELS OF AMBIENT OXYGENATION

BY JEAN FORGUE, BERNARD BURTIN  
AND JEAN-CHARLES MASSABUAU

*Laboratoire d'Etude des Régulations Physiologiques, associé à l'Université  
Louis Pasteur, Centre National de la Recherche Scientifique, 23 rue Becquerel,  
67087 Strasbourg, France*

*Accepted 5 January 1989*

### Summary

The mechanisms of adaptation that allow the teleost *Silurus glanis* to maintain its resting oxygen consumption constant when the  $O_2$  partial pressure ( $P_{O_2}$ ) in the inspired water ( $P_{IO_2}$ ) varied between 40 and 3 kPa were studied at 13°C. Steady-state values of oxygen consumption, ventilatory and circulatory flow rates,  $P_{O_2}$  in the inspired and expired water,  $P_{O_2}$  and  $O_2$  concentration in the arterial and venous blood, haematocrit and acid–base status in the arterial blood were determined after 1-day exposures at selected  $P_{IO_2}$  values. Whole-blood  $O_2$ -binding characteristics were also determined.

The key adaptation after 1 day of acclimation was maintenance of oxygen consumption by ventilatory adjustment with no change in blood flow rate or pH (no Bohr effect). At each  $P_{IO_2}$  value (i) the ventilatory adjustment was minimal as the  $O_2$  extraction coefficient from water always remained around 80–90 % and (ii)  $Pa_{O_2}$  stayed constant at about 2 kPa. Data are compared with previous results in crayfish and other teleosts. It is concluded that the principle of a constant  $O_2$  status in the *milieu intérieur* – independent of large changes in  $P_{IO_2}$  for a given state of activity – should be valid in many crustaceans and teleosts.

### Introduction

In most water-breathers, oxygen consumption can be maintained constant in spite of large changes in ambient oxygenation. In the crayfish *Astacus leptodactylus* we reported the mechanisms which permit this maintenance at basal metabolism (Massabauau & Burtin, 1984). We showed that when this crustacean is exposed to different oxygenation levels, ventilation is adjusted so that the  $O_2$  partial pressure ( $P_{O_2}$ ) in the arterial blood ( $Pa_{O_2}$ ) is maintained in a low and narrow range: it increased from  $1 \pm 0.2$  to  $3.5 \pm 0.4$  kPa when the inspired  $P_{O_2}$  ( $P_{IO_2}$ ) increased from 3 to 33 kPa. In absolute terms this  $Pa_{O_2}$  change appears rather small

Key words: fish, *Silurus*, respiration, regulation, oxygen consumption, acid–base balance, countercurrent.

compared to the  $P_{\text{IO}_2}$  increase. Concurrently,  $P_{\text{O}_2}$  in the expired water remained constant around 1 kPa. Other adaptations are a Bohr effect appearing below 10 kPa (Sakakibara *et al.* 1987) and an increase of blood flow rate below 5 kPa (Massabuau & Burtin, 1984). The relative constancy of  $P_{\text{O}_2}$  in the fluids leaving the gas exchanger is consistent with the existence of  $\text{O}_2$  chemoreception in the branchial cavities (Massabuau & Burtin, 1984).

The aim of the present work was to learn whether this strategy for maintaining resting  $\dot{M}_{\text{O}_2}$  constant – largely based on ventilatory control of  $P_{\text{aO}_2}$  – is restricted to *A. leptodactylus* or part of a more general pattern in water-breathers. As noted by Shelton *et al.* (1986), there are data suggesting that in fishes with high  $\text{O}_2$ -affinity respiratory pigments,  $P_{\text{aO}_2}$  'may be little affected' by  $P_{\text{IO}_2}$  changes (see for example Eddy, 1974, fig. 2 and table 1; Itazawa & Takeda, 1978, table 1). There has been no comprehensive demonstration of this. We present data showing that this strategy exists in the wels (or sheat-fish), *Silurus glanis*. It is a nocturnal fish living in lakes and slow-flowing streams (Muus & Dahlstrom, 1978). During the daytime wels lie on the bottom in hollows or under stones and, like crayfish, rarely move, so that measurements can be made on animals that spontaneously remain at basal metabolism.

### Materials and methods

Experiments were performed on 19 male and female wels, *Silurus glanis*, reared in captivity and acclimated in our laboratory for at least 2 months. Animals were fed with frozen fish and beef heart. During maintenance and experimental periods, the animals were supplied with water from the Strasbourg water table (see Table 1 for water ionic composition;  $T = 13^\circ\text{C}$ ; partial pressure of carbon dioxide,  $P_{\text{CO}_2} \approx 0.1$  kPa;  $\text{pH} \approx 8.30\text{--}8.40$ ;  $P_{\text{O}_2} \approx 20$  kPa during the maintenance period, variable during experiments;  $\text{O}_2$  capacity coefficient in the water,  $\beta_{\text{wO}_2} = 15.67 \mu\text{mol l}^{-1} \text{ kPa}^{-1}$ ). During experiments, acid–base balance in the water was controlled with a  $\text{pH}\text{--CO}_2$ -stat (Dejours *et al.* 1978). During experiments fishes were unfed. They were maintained under a natural rhythm of light conditions (dim light during the daytime) and could not see the experimenter. Five types of experiments were performed. All values are presented as mean

Table 1. *Ionic composition of the water used*

| Ion              | Concentration<br>(mequiv l <sup>-1</sup> ) | Ion                                 | Concentration<br>(mequiv l <sup>-1</sup> ) |
|------------------|--------------------------------------------|-------------------------------------|--------------------------------------------|
| $\text{NH}_4^+$  |                                            | $\text{HCO}_3^- + \text{CO}_3^{2-}$ | 4.44                                       |
| $\text{Na}^+$    | 0.490                                      | $\text{Cl}^-$                       | 0.820                                      |
| $\text{K}^+$     | 0.086                                      | $\text{NO}_2^-$                     | 0.002                                      |
| $\text{Mg}^{2+}$ | 1.22                                       | $\text{NO}_3^-$                     | 0.058                                      |
| $\text{Ca}^{2+}$ | 4.88                                       | $\text{SO}_4^{2-}$                  | 1.30                                       |
| Sum of cations   | 6.676                                      | Sum of anions                       | 6.620                                      |

Strasbourg water table.

$\pm 1$  standard error (S.E.).  $P < 0.05$  was taken as the fiducial limit of significance in paired  $t$ -tests.

#### *O<sub>2</sub>-binding curve of whole blood*

These determinations were performed in winter on six animals weighing  $685 \pm 89$  g. Blood was sampled by puncturing the caudal aorta or vein of anaesthetized fish (urethane  $8 \text{ g l}^{-1}$ ). The heparinized blood was stored in a rotating system immersed in melting ice. Gas equilibration was performed at  $13^\circ\text{C}$  in a bowl-shaped tonometer (Radiometer type) gently shaken for 30 min. Gas mixtures,  $\text{N}_2/\text{O}_2/\text{CO}_2$ , were obtained by using gas-mixing pumps (Wösthoff, Bochum). The  $\text{O}_2$  concentration of equilibrated blood was measured with a modified Tucker chamber (Tucker, 1967) on  $10 \mu\text{l}$  samples and pH was determined with a Radiometer 6299A capillary electrode at  $13^\circ\text{C}$ .

#### *Measurements of oxygen consumption ( $\dot{M}_{O_2}$ ) and estimation of water flow ( $\dot{V}_w$ )*

These experiments were performed in February and March on five *Silurus* weighing  $127 \pm 20$  g.  $\dot{M}_{O_2}$  was measured in an open-flow respirometer, volume 1300 ml, using the technique described by Massabuau *et al.* (1984). These measurements, together with the defined  $P_{\text{IO}_2}$  and the measured  $P_{\text{EO}_2}$  (see below), permitted calculation of ventilation,  $\dot{V}_w$ , using the Fick principle (Saunders, 1962). Because the existence and importance of possible cutaneous oxygen uptake was not taken into account, the actual value of  $\dot{V}_w$  may have been somewhat overestimated. No allometric correction of  $\dot{M}_{O_2}$  was made as in the studied range there was no significant difference with the 1 kg standard-mass correction. Each animal was placed in the respirometer at least 24 h before measurements began. It was then exposed for periods of 90 min to 24 h to five levels of  $P_{\text{IO}_2}$ . The order of presentation was 20, 40, 10, 5 and 2 kPa. Because results were independent of the exposure period, all data at each  $P_{\text{IO}_2}$  were computed together.

#### *Measurements of $P_{O_2}$ in the expired water, $P_{\text{EO}_2}$*

Seven animals weighing  $809 \pm 43$  g were used for this experiment performed in February and March. To sample the expired water, a catheter was fixed on the upper part of the operculum, above the pectoral fin, where the water flows out after having ventilated the apex of the gill arches (Fig. 1). A hole ( $\approx 1.5$  mm in diameter) was drilled through the cleithrum, 1–2 mm anterior to the thin sheet of tissue that comes into contact with the body and prevents water reflux. A polyethylene catheter (i.d. 0.38 mm, o.d. 1.09 mm, length 50–55 cm), with the inner end shaped into a collar of 5 mm diameter, was slipped into the hole from the internal face of the operculum. A second catheter (length  $\approx 5$  mm), with the outer end shaped into a 5–7 mm diameter collar, was slipped over the first from outside the operculum. They were tied together with a thin stainless-steel wire. The inside of the assembly projected less than 0.5–1 mm into the branchial chamber. The surgery took about 5 min and was performed on anaesthetized animals. Fish were then acclimated for 2–3 days in the experimental tank ( $43 \text{ cm} \times 35 \text{ cm} \times 16 \text{ cm}$ ,

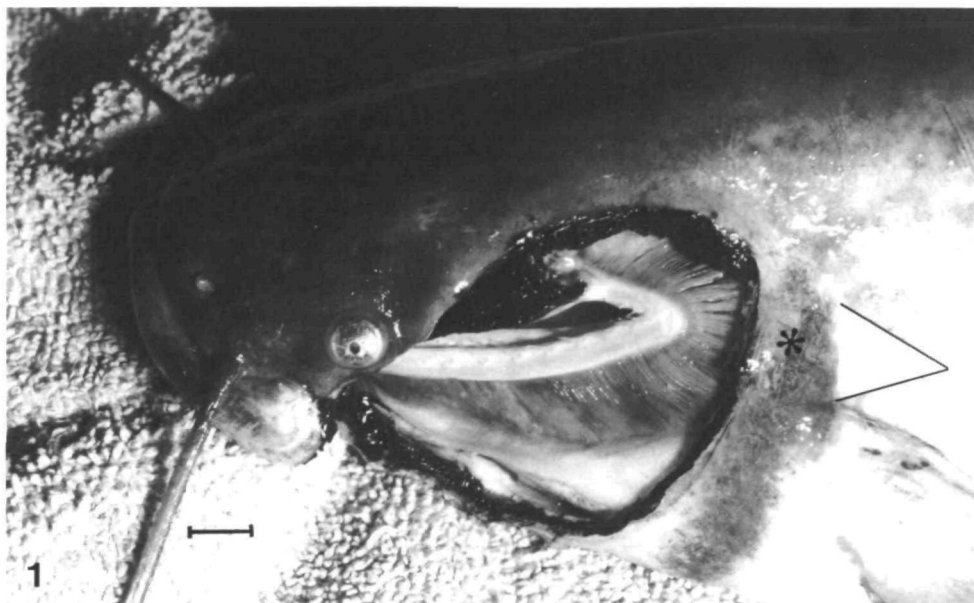

Fig. 1. Side view of the branchial cavity in a 1 kg *Silurus glanis* showing the shape of the gill arches (central part of the operculum removed). The white arrow shows the duct where the water is expired after having perfused the apex of the gill arches; the asterisk shows the site where expired water was sampled. Scale bar, 1 cm.

renewal rate  $10\text{ l h}^{-1}$ ) before measurements began. The catheter passed freely through the roof of the experimental box (in a 3 mm hole), and a small piece of Teflon prevented it falling into the tank.  $\text{PE}_{\text{O}_2}$  was continuously recorded during the daytime using a Radiometer polarographic electrode placed in series between the sampling catheter and a Gilson peristaltic pump (flow rate  $0.1\text{ ml min}^{-1}$ ). At night, when the animal was active, the catheter was disconnected. The injection port of the  $\text{P}_{\text{O}_2}$  electrode was equipped with a T-tube operated by remote control so that it could be calibrated before and after every set of measurements without disturbing the fish. The order of  $\text{P}_{\text{O}_2}$  presentation was as above and each plateau lasted about 24 h. Consequently an experiment with a single animal took about 1 week.

#### *Measurements of acid-base balance and $\text{P}_{\text{O}_2}$ in the arterial blood ( $\text{Pa}_{\text{O}_2}$ )*

This was performed in June and July on six *Silurus* weighing  $775 \pm 43\text{ g}$ . Animals were kept in the same apparatus as above and exposed to the same protocol of  $\text{P}_{\text{O}_2}$  plateaus. Arterial blood was sampled following the technique described for crayfish by Massabuau & Burtin (1984). Its advantage is that it is a push-pull system which requires only a single catheter rather than the complete extracorporeal loop. A catheter was implanted in the caudal aorta 3–5 cm anterior to the caudal fin. It consisted of two parts: a silicone tube (i.d. 0.30 mm, o.d. 0.64 mm, length 2 cm) which was inserted in the aorta and a polyethylene catheter (i.d.

0.38 mm, o.d. 1.09 mm, length 50–55 cm). If used every day it remained patent for 3–4 weeks before spontaneously falling out. After a 7- to 10-day recovery period  $P_{aO_2}$  was measured once a day between 10.00 and 11.00 h. In brief, the system consisted of the arterial catheter, a thermostatted  $P_{O_2}$  electrode, a 2-m polyethylene tube acting as a blood reservoir and a Gilson peristaltic pump (blood flow rate  $0.07 \text{ ml min}^{-1}$ ) placed in series.  $P_{aO_2}$  was read exactly 6 min after the beginning of the sampling period. Before reinjection into the fish,  $100 \mu\text{l}$  of blood was anaerobically sampled in capillary tubes for analysis of acid–base balance. This sample was immediately used to determine pH<sub>a</sub> (with a Radiometer 6299A capillary electrode thermostatted at  $13^\circ\text{C}$ ) and  $\text{CaCO}_2$ , the total  $\text{CO}_2$  concentration (with a modified Cameron chamber; Cameron, 1971). From these values, arterial blood  $\text{CO}_2$  partial pressure,  $P_{a\text{CO}_2}$ , and bicarbonate concentration,  $[\text{HCO}_3^-]_a$ , were calculated using a  $\text{CO}_2$  solubility of  $0.396 \text{ mmol l}^{-1} \text{ kPa}^{-1}$ ,  $\text{pK}'_1 = 6.21$  and  $\text{pK}'_2 = 9.68$  (J.-L. Rodeau & B. Burtin, unpublished data; throughout the text we use  $[\text{HCO}_3^-]_a$  for  $[\text{HCO}_3^-]_a + 2[\text{CO}_3^{2-}]_a$ ).

*Measurement of  $O_2$  concentration in mixed venous blood ( $C\bar{v}_{O_2}$ ); estimation of blood flow rate ( $\dot{V}b$ ) and venous  $P_{O_2}$  ( $P\bar{v}_{O_2}$ )*

Five *Silurus* weighing  $742 \pm 49 \text{ g}$  were examined in February and March. Surgery and experimental procedures were the same as those described above except that (i) mixed venous blood was sampled from the ventral aorta and (ii)  $\text{CO}_2$  was measured instead of  $P_{O_2}$  because of the expected  $P\bar{v}_{O_2}$  range and the shape of the  $O_2$ -binding curve (see Fig. 2). The animals were exposed to the same  $P_{O_2}$  plateaus as above, and  $100 \mu\text{l}$  of venous blood was sampled once a day between 10.00 and 12.00 h. The  $O_2$  concentration was immediately measured using a modification of Tucker's method (Tucker, 1967).

Blood flow rate was estimated by the Fick principle, using these  $C\bar{v}_{O_2}$  values,  $\text{CaO}_2$  values obtained by graphical extrapolation on the  $O_2$ -binding curve recalculated for a haematocrit (Hct) of 14 % (see Results) and the  $\dot{M}_{O_2}$  measurements.  $P\bar{v}_{O_2}$  was estimated by graphical extrapolation of the same recalculated  $O_2$ -binding curve.

## Results

Mean  $O_2$ -binding curves for whole blood in *Silurus* are presented in Fig. 2 at two  $P_{\text{CO}_2}$  and pH values. The curves are hyperbolic and  $P_{50}$  was  $0.64 \pm 0.03 \text{ kPa}$  at  $\text{pH} = 7.96 \pm 0.02$  and  $P_{\text{CO}_2} = 0.2 \text{ kPa}$ ; it was  $0.85 \pm 0.04 \text{ kPa}$  at  $\text{pH} = 7.69 \pm 0.01$  and  $P_{\text{CO}_2} = 0.7 \text{ kPa}$ . There was a Bohr effect,  $\Delta \log P_{50} / \Delta \text{pH} = -0.46 \pm 0.06$ , but no visible Root effect at the studied pH. The haematocrit of the blood used for these determinations was  $25.0 \pm 1.6 \%$ . In chronically cannulated fishes it was always lower, and decreased to  $14.0 \pm 0.8 \%$  within 1 week. To take this into account – with the assumption that haemoglobin characteristics did not change – we recalculated  $O_2$ -binding curves for  $\text{Hct} = 14 \%$  (dotted lines in Fig. 2). Following Roughton (1964), they are geometrically similar to the curves at

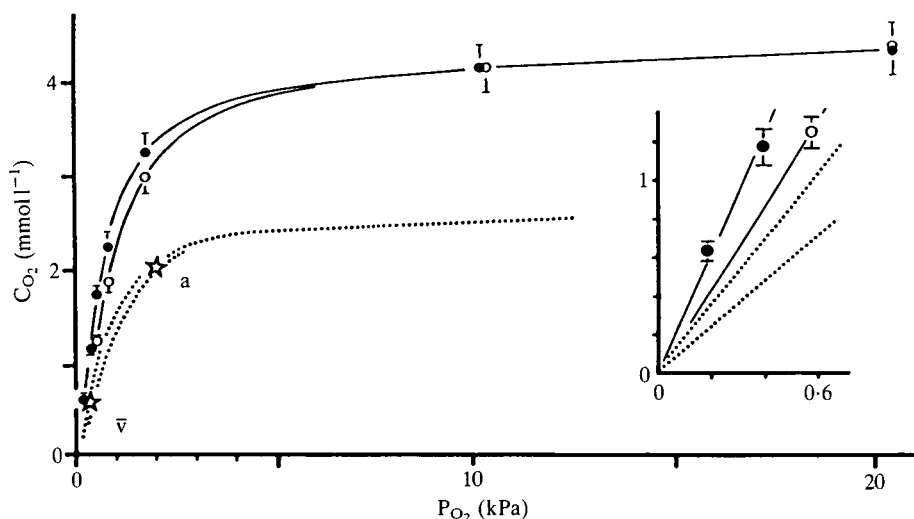

Fig. 2. Solid lines: *in vitro* O<sub>2</sub>-binding curves at two experimental P<sub>CO<sub>2</sub></sub> and pH values determined on blood sampled from anaesthetized fishes ( $N = 6$ ; Hct = 25 %;  $T = 13^{\circ}\text{C}$ ; ( $\bullet$ ), pH =  $7.96 \pm 0.02$  and P<sub>CO<sub>2</sub></sub> = 0.2 kPa; ( $\circ$ ), pH =  $7.69 \pm 0.01$  and P<sub>CO<sub>2</sub></sub> = 0.7 kPa; means  $\pm 1$  s.e.). Dotted lines, recalculated curves for Hct = 14 %. Paired curves are geometrically similar; they have the same P<sub>50</sub> (see text). O<sub>2</sub> solubility coefficient =  $22 \mu\text{mol l}^{-1} \text{ kPa}^{-1}$ . Inset: enlarged view of the origin area assuming the curves are hyperbolic. This graph was used to estimate P $\bar{v}_{\text{O}_2}$  from C $\bar{v}_{\text{O}_2}$  and CaO<sub>2</sub> from PaO<sub>2</sub>. a, arterial point and  $\bar{v}$ , venous point in Table 2.

Hct = 25 % (scale 14:25) and have the same P<sub>50</sub>. Sixteen red cell counts in four animals at different times after manipulation showed that Hct was linearly related to cell count: number of red blood cell =  $67\,500\text{Hct} + 38\,000$ .

Table 2 shows all the respiratory variables measured and calculated in *Silurus* exposed to selected and fixed P<sub>I<sub>O<sub>2</sub></sub></sub> levels. Between 40 and 3 kPa,  $\dot{M}_{\text{O}_2}$  was maintained constant, whereas  $\dot{V}_w$  was greater the lower the P<sub>I<sub>O<sub>2</sub></sub></sub>. We believe that 2 kPa is about the lower limit of the regulation, as in one animal in which  $\dot{M}_{\text{O}_2}$  was measured at a lower P<sub>I<sub>O<sub>2</sub></sub></sub> value it decreased linearly below this value. Fig. 3 is a typical example of the P<sub>E<sub>O<sub>2</sub></sub></sub> changes recorded during the daytime as fishes were kept at fixed P<sub>I<sub>O<sub>2</sub></sub></sub> values. P<sub>E<sub>O<sub>2</sub></sub></sub> was typically low but interspersed with transient peaks. The frequency of P<sub>E<sub>O<sub>2</sub></sub></sub> peaks – which, based on visual observations, corresponded to periodic ‘sighs’ – was independent of P<sub>I<sub>O<sub>2</sub></sub></sub>, but their amplitude was higher when P<sub>I<sub>O<sub>2</sub></sub></sub> increased. At P<sub>I<sub>O<sub>2</sub></sub></sub> = 3–3.5 kPa, P<sub>E<sub>O<sub>2</sub></sub></sub> was constant and at 38 kPa it could remain steady at about 2 kPa for more than 1 h. Resting values were never as low as zero at any P<sub>I<sub>O<sub>2</sub></sub></sub>. Values of P<sub>E<sub>O<sub>2</sub></sub></sub> were sampled every 6 min in all animals. Depending on technical problems the recording period covered between 6 and 8 h, i.e. 60–80 values per animal. The frequency distribution of P<sub>E<sub>O<sub>2</sub></sub></sub> values is shown in Fig. 4. The modal value of P<sub>E<sub>O<sub>2</sub></sub></sub> was also determined for each animal at every P<sub>I<sub>O<sub>2</sub></sub></sub> value. The mean of these is presented in Fig. 5A, together with the results of the PaO<sub>2</sub> measurements and P $\bar{v}_{\text{O}_2}$  estimates. At values of P<sub>I<sub>O<sub>2</sub></sub></sub> between

Table 2. *Respiratory variables in Silurus glanis exposed to various oxygenation levels and constant acid-base balance status in the water ( $T = 13^\circ\text{C}$ )*

|                                                                                                              | $P_{\text{IO}_2}$ (kPa) |                 |                 |                 |                 |
|--------------------------------------------------------------------------------------------------------------|-------------------------|-----------------|-----------------|-----------------|-----------------|
|                                                                                                              | $3.1 \pm 0.2$           | $5.2 \pm 0.6$   | $10.8 \pm 0.3$  | $19.2 \pm 0.7$  | $39.0 \pm 0.8$  |
| $\dot{M}_{O_2} \text{ B}^{-1}$ ( $\mu\text{mol kg}^{-1} \text{ min}^{-1}$ )                                  | $15.3 \pm 1.3$          | $15.3 \pm 1.3$  | $15.4 \pm 1.3$  | $15.4 \pm 1.5$  | $14.7 \pm 2.0$  |
| $\dot{V}_w \text{ B}^{-1}$ ( $\text{ml kg}^{-1} \text{ min}^{-1}$ )*                                         | 416                     | 212             | 112             | 56              | 26              |
| $\dot{V}_w \beta_w \text{ B}^{-1}$<br>( $\mu\text{mol kPa}^{-1} \text{ kg}^{-1} \text{ min}^{-1}$ )*         | 6.52                    | 3.32            | 1.75            | 0.88            | 0.40            |
| $\dot{V}_b \beta_a \bar{v} \text{ B}^{-1}$ ( $\text{ml kg}^{-1} \text{ min}^{-1}$ )*                         | 8.5                     | 9.0             | 9.3             | 9.0             | 9.2             |
| $\dot{V}_b \beta_a \bar{v} \text{ B}^{-1}$<br>( $\mu\text{mol kPa}^{-1} \text{ kg}^{-1} \text{ min}^{-1}$ )* | 7.74                    | 7.92            | 8.18            | 7.92            | 8.09            |
| $\dot{V}_w \dot{V}_b^{-1}$ *                                                                                 | 49.0                    | 23.5            | 12.0            | 6.2             | 2.8             |
| $\dot{V}_w \beta_w \dot{V}_b^{-1} \beta_a \bar{v}^{-1}$ *                                                    | 0.84                    | 0.42            | 0.21            | 0.11            | 0.05            |
| $\dot{V}_w \dot{M}_{O_2}^{-1}$ ( $\text{ml } \mu\text{mol}^{-1}$ )*                                          | 27.2                    | 13.8            | 7.3             | 3.6             | 1.8             |
| $\dot{V}_b \dot{M}_{O_2}^{-1}$ ( $\text{ml } \mu\text{mol}^{-1}$ )*                                          | 0.5                     | 0.6             | 0.6             | 0.6             | 0.6             |
| $P_{\text{EO}_2}$ (kPa)                                                                                      | $0.8 \pm 0.2$           | $0.7 \pm 0.4$   | $2.2 \pm 0.5$   | $2.1 \pm 0.4$   | $3.9 \pm 1.4$   |
| $\Delta P_{\text{I,EO}_2}$ (kPa)*                                                                            | $2.6 \pm 1.2$           | $5.0 \pm 0.3$   | $8.1 \pm 1.5$   | $17.7 \pm 0.5$  | $34.3 \pm 1.7$  |
| $E_{wO_2}$ *                                                                                                 | $0.75 \pm 0.06$         | $0.88 \pm 0.03$ | $0.78 \pm 0.05$ | $0.89 \pm 0.02$ | $0.90 \pm 0.04$ |
| $P_{aO_2}$ (kPa)                                                                                             | $1.9 \pm 0.5$           | $1.6 \pm 0.2$   | $1.9 \pm 0.2$   | $2.3 \pm 0.3$   | $2.0 \pm 0.3$   |
| $\text{Ca}_{O_2}$ (mmol l $^{-1}$ )*                                                                         | $2.0 \pm 0.1$           | $1.9 \pm 0.1$   | $2.0 \pm 0.1$   | $2.1 \pm 0.1$   | $2.0 \pm 0.1$   |
| $P_{\bar{v}O_2}$ (kPa)*                                                                                      | 0.3                     | 0.3             | 0.4             | 0.6             | 0.7             |
| $\text{C}\bar{v}O_2$ (mmol l $^{-1}$ )                                                                       | $0.4 \pm 0.1$           | $0.4 \pm 0.1$   | $0.4 \pm 0.1$   | $0.7 \pm 0.1$   | $0.9 \pm 0.2$   |
| $\Delta P_a \bar{v}O_2$ (kPa)*                                                                               | 1.7                     | 1.4             | 1.6             | 1.9             | 1.6             |
| $\Delta \text{Ca} \bar{v}O_2$ (mmol l $^{-1}$ )*                                                             | 2.7                     | 2.8             | 2.9             | 2.7             | 2.5             |
| $E_{bO_2}$ *                                                                                                 | 0.87                    | 0.87            | 0.88            | 0.79            | 0.73            |
| $\text{Sb}$ *                                                                                                | 0.43                    | 0.73            | 0.85            | 0.91            | 0.97            |
| pHa                                                                                                          | $7.93 \pm 0.03$         | $7.93 \pm 0.03$ | $7.96 \pm 0.02$ | $7.96 \pm 0.02$ | $7.92 \pm 0.02$ |
| $\text{CaCO}_2$ (mmol l $^{-1}$ )                                                                            | $2.79 \pm 0.11$         | $3.21 \pm 0.17$ | $4.04 \pm 0.34$ | $6.26 \pm 0.47$ | $8.81 \pm 0.72$ |
| $P_{a\text{CO}_2}$ (kPa)*                                                                                    | $0.13 \pm 0.01$         | $0.15 \pm 0.02$ | $0.18 \pm 0.02$ | $0.27 \pm 0.02$ | $0.44 \pm 0.02$ |
| Hct (%)                                                                                                      | $13 \pm 1.9$            | $14 \pm 2.6$    | $13 \pm 0.8$    | $17 \pm 1.4$    | $13 \pm 1.3$    |

Unstarred values were directly measured, starred values were calculated.

$N = 5-7$ , see text.

$P_{\text{IO}_2}$ ,  $O_2$  partial pressure,  $P_{O_2}$ , in the inspired water;  $\dot{M}_{O_2} \text{ B}^{-1}$ , oxygen consumption per unit of body mass;  $\dot{V}_w \text{ B}^{-1}$ , ventilatory flow rate per unit of body mass;  $\dot{V}_w \beta_w \text{ B}^{-1}$ , ventilatory conductance per unit of body mass;  $\dot{V}_b \text{ B}^{-1}$ , circulatory (or perfusive) flow rate per unit of body mass;  $\dot{V}_b \beta_a \bar{v} \text{ B}^{-1}$ , perfusive conductance per unit of body mass;  $\dot{V}_w \dot{V}_b^{-1}$ , ventilation/perfusion ratio;  $\dot{V}_w \beta_w \dot{V}_b^{-1} \beta_a \bar{v}^{-1}$ , ventilatory/perfusive conductance ratio;  $\dot{V}_w \dot{M}_{O_2}^{-1}$ , specific ventilation;  $\dot{V}_b \dot{M}_{O_2}^{-1}$ , specific circulatory flow rate;  $P_{\text{EO}_2}$ , mode of  $P_{O_2}$  in the expired water;  $\Delta P_{\text{I,EO}_2}$ ,  $P_{O_2}$  difference between inspired and expired water;  $E_{wO_2}$ , extraction coefficient of water  $O_2$ ;  $P_{aO_2}$ ,  $P_{O_2}$  in the arterial blood;  $\text{Ca}_{O_2}$ ,  $O_2$  concentration in the arterial blood;  $P_{\bar{v}O_2}$ ,  $P_{O_2}$  in the venous blood;  $\text{C}\bar{v}O_2$ ,  $O_2$  concentration in the venous blood;  $\Delta P_a \bar{v}O_2$ ,  $P_{O_2}$  difference between arterial and venous blood;  $\Delta \text{Ca} \bar{v}O_2$ ,  $O_2$  difference between arterial and venous blood;  $E_{bO_2}$ , extraction coefficient of blood  $O_2$ ;  $\text{Sb}$ , blood shunt fraction; pHa, pH in the arterial blood;  $\text{CaCO}_2$ ,  $\text{CO}_2$  concentration in the arterial blood;  $P_{a\text{CO}_2}$ ,  $\text{CO}_2$  partial pressure in the arterial blood; Hct, haematocrit measured on the arterial blood. All symbols taken from Dejours (1981) and Piiper & Scheid (1984).

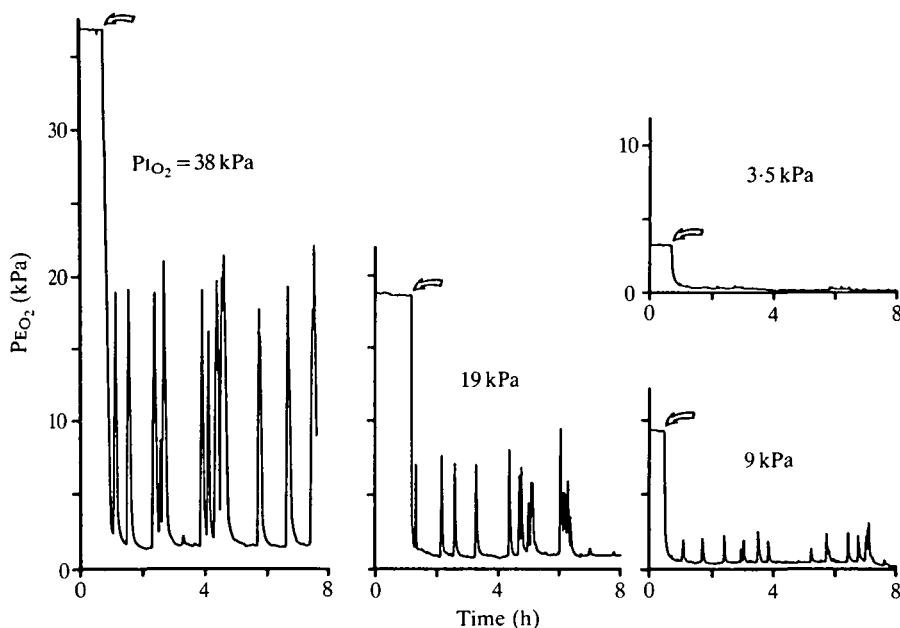

Fig. 3. Example of  $O_2$  partial pressure changes in the expired water of *Silurus glanis* maintained at selected values of inspired  $P_{O_2}$  as a function of time. Switches of measurements from inspired to expired water are shown by arrows. The record is characterized by an alternation between a low steady  $PE_{O_2}$  value and peak transient values, except at  $PI_{O_2} = 3.5$  kPa.

about 3 and 40 kPa, the modal value of  $PE_{O_2}$  increased from  $0.8 \pm 0.2$  to  $3.9 \pm 1.4$  kPa ( $P < 0.05$ ; paired  $t$ -test) whereas  $Pa_{O_2}$  and  $P\bar{v}_{O_2}$  values did not change. The haematocrit remained constant and was independent of  $PI_{O_2}$ . The corresponding changes in acid-base balance in the arterial blood are shown in Fig. 5B. Values of pH<sub>a</sub> were generally constant at varying levels of  $[HCO_3^-]_a$  and  $Pa_{CO_2}$ . As a consequence of the maintenance of  $Pa_{O_2}$  and pH<sub>a</sub> (assuming no changes in haemoglobin characteristics),  $Ca_{O_2}$  remained constant at  $2 \text{ mmol l}^{-1}$ . On the  $O_2$ -binding curve this corresponds to 85 % saturation. As  $C\bar{v}_{O_2}$  was also constant, the arteriovenous  $O_2$  concentration difference ( $\Delta Ca, \bar{v}_{O_2}$ ),  $\dot{V}_b$  and the  $O_2$  capacity coefficient in the blood ( $\beta_a, \bar{v} = 880 \text{ } \mu\text{mol l}^{-1} \text{ kPa}^{-1}$ ) did not vary.

## Discussion

### *Comparison with previous data*

The present study reports steady-state respiratory adaptations in the teleost *S. glanis* after 1-day acclimation periods at various levels of inspired  $P_{O_2}$ . Although many previous studies of water-breathers have been devoted to this subject, homeostatic mechanisms have received little attention (Dejours, 1988). Our aim was to learn whether the principles of breathing control we found in crayfish (see



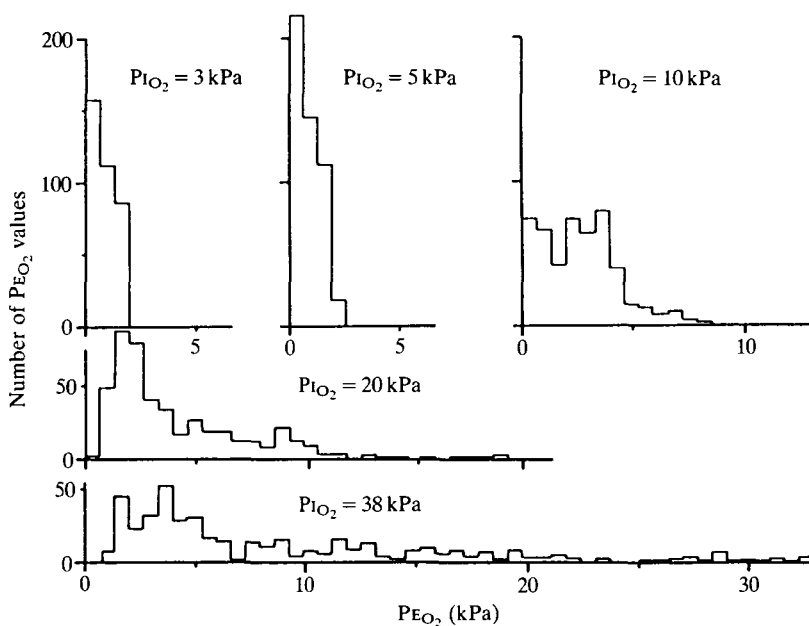

Fig. 4. Distribution of  $O_2$  partial pressures values in the expired water,  $P_{EO_2}$ , of seven *Silurus glanis* exposed to selected values of inspired  $P_{O_2}$ ,  $P_{IO_2}$ . The number of  $P_{EO_2}$  values counted in each  $P_{EO_2}$  class (on the abscissa) of 0.67 kPa are shown.

Introduction) could be extended to teleosts. We did not intend to study the acute phases of adaptation but rather the results of the adaptation. In humans and birds (Bouverot, 1985), as in crayfish (Massabuau & Burtin, 1984), it is generally agreed that the early respiratory changes result from the  $O_2$  stimulation of peripheral chemoreceptors. In teleosts there are strong arguments in favour of the existence of such peripheral  $O_2$  chemoreceptors located in, or close to, the branchial cavity (Eclancher, 1972, 1975; Eclancher & Dejours, 1975; Bamford, 1974; Milsom & Brill, 1986).

Our measurements of blood characteristics are comparable to those of Albers *et al.* (1981) in *Silurus glanis* and those of Haws & Goodnight (1962) in the related freshwater species *Ictalurus nebulosus* and *Ictalurus punctatus*. We found similar hyperbolic  $O_2$ -binding curve and  $P_{50}$  values. The oxygen capacity we report is comparable to those of *I. punctatus* and *I. nebulosus*, but  $\Delta \log P_{50} / \Delta pH$  is lower than that given by Albers *et al.* (1981). Our haematocrit values ( $25.0 \pm 1.6\%$ ) and red blood cell count measured on the sample taken in the anaesthetized animals are comparable to the values reported by Albers *et al.* (1981) in the same experimental conditions. In the resting state they differ little from the  $16 \pm 2\%$  reported in chronically cannulated dogfish by Baumgarten-Schumann & Piiper (1968). It is likely that these differences were related to the stress of surgery and anaesthesia, as we observed negligible blood loss. Following severe exercise induced by chasing, fish can exhibit a Hct increase of 40%, due mainly to

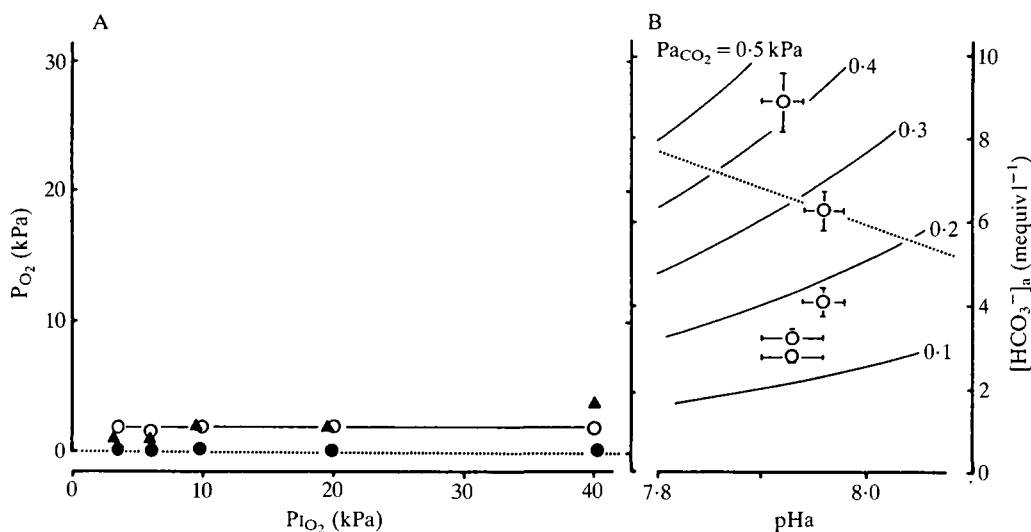

Fig. 5. (A) Steady-state values of  $O_2$  partial pressure,  $P_{O_2}$ , in arterial (○) and mixed venous (●) blood and in expired water (▲) after, or during, 24 h at selected  $O_2$  partial pressures in the inspired water,  $P_{I,O_2}$ . All values remained in a very low and narrow range independent of  $P_{I,O_2}$  ( $N = 5-7$ ; see Table 2 for s.e.). (B) Steady-state values of arterial acid-base status in six *Silurus* after 24 h at various  $P_{I,O_2}$  values (from top to bottom  $P_{I,O_2} = 40, 20, 10, 6$  and  $3.5$  kPa). The dotted line gives the slope of the buffer line determined *in vitro*. pH values are not statistically different (means  $\pm 1$  s.e.). See Table 2 for exact values.

contraction of the spleen and a shift of water out of the plasma (Yamamoto *et al.* 1980). The low values of  $P_{aO_2}$  we report are in the range for other quiescent water-breathers, such as resting eels (Steen & Krusysse, 1964) and crayfish (Massabau & Burtin, 1984), whereas much higher values have been observed in excited animals (Steen & Krusysse, 1964; Baumgarten-Schumann & Piiper, 1968). Notice that (i)  $P_{aO_2}$  is adjusted to a value ( $\approx 2$  kPa) very close to the minimum required to ensure intracellular  $O_2$  supply in single-cell suspensions of rat hepatocytes (Jones & Kennedy, 1982) and (ii)  $P\bar{v}O_2 \approx 0.2$  kPa give a mean 'in vivo' estimate of the intracellular  $P_{O_2}$  in *S. glanis* at basal metabolism. In *Silurus*,  $P_{50} = 0.6$  kPa, the values of  $P_{aO_2}$  and  $P\bar{v}O_2$  we observed give the same  $CaO_2$  and  $C\bar{v}O_2$  values as those in 'normoxic' dogfish which have higher  $P_{aO_2}$  and  $P\bar{v}O_2$  values but a  $P_{50}$  of 2.13 kPa ( $T = 17^\circ\text{C}$  and  $P_{CO_2} = 0.2$  kPa; Baumgarten-Schumann & Piiper, 1968). The value of  $\dot{M}_{O_2}$  reported here is similar to the value we reported in *A. leptodactylus* ( $13.8 \pm 0.8 \mu\text{mol kg}^{-1} \text{min}^{-1}$ ; Massabau & Burtin, 1984) kept in identical water conditions. It is also similar to values obtained in eel ( $16.80 \pm 0.79 \mu\text{mol kg}^{-1} \text{min}^{-1}$  at  $11.5^\circ\text{C}$  by Kirsch & Nonnotte, 1977), tench ( $20.2 \pm 1.16 \mu\text{mol kg}^{-1} \text{min}^{-1}$  at  $13^\circ\text{C}$  by Nonnotte, 1981) and dogfish ( $20.7 \pm 1.8 \mu\text{mol kg}^{-1} \text{min}^{-1}$  at  $15^\circ\text{C}$ ) by Butler & Taylor, 1975;  $28.4 \pm 7.6 \mu\text{mol kg}^{-1} \text{min}^{-1}$  at  $15-17^\circ\text{C}$  by Baumgarten-Schumann & Piiper, 1968). All experiments were performed in winter, except for the arterial acid-base balance and  $P_{O_2}$  measurements which were performed

summer. This raised the problem of comparing respiratory parameters measured at different times of the year and at potentially different metabolic levels. In resting carp there is no significant variation in  $P_{aO_2}$  between 24.5°C ( $3.3 \pm 1$  kPa in Itazawa & Takeda, 1978) and 10°C ( $3.8 \pm 2.1$  kPa or  $1 \pm 0.6$  kPa in Garey, 1967). Consequently it is unlikely that a potential increase of resting metabolism in summer interfered with our  $P_{aO_2}$  measurements.

*Mechanism of  $\dot{M}_{O_2}$  maintenance in resting Silurus*

The key point in the respiratory adaptation of *Silurus* is that when  $P_{iO_2}$  varies between 40 and 3 kPa, steady-state  $\dot{M}_{O_2}$  after 1 day of acclimation appears to be maintained exclusively by ventilatory adjustment with no change of blood flow rate or pH (no Bohr effect). This corresponds to an adaptation based on a principle of economy, because  $\dot{V}_w$  – even though it increases 16-fold between  $P_{iO_2} = 40$  and  $P_{iO_2} = 3$  kPa – remains close to its minimum possible value at each  $P_{iO_2}$  value. Indeed, the  $O_2$  extraction coefficient is always around 80–90 %. As a result of this  $\dot{V}_w$  adaptation, the value of  $P_{aO_2}$  remains constant at about 2 kPa. It is likely that  $P_{aO_2}$  must be the controlled variable, by analogy with what is known from higher vertebrates (Bouverot, 1985). The capacity to function at such low  $P_{aO_2}$  values must be related to the very high haemoglobin  $O_2$ -affinity in *Silurus* (Fig. 2). The effect of the high  $O_2$ -affinity on extraction and ventilation in fishes has recently been discussed by Malte & Weber (1987). During inactive periods, *Silurus* rests in an environment that can be hypoxic, and the problem of  $O_2$  uptake from the medium is obviously a priority. The details of this mechanism should be different in fishes with lower blood  $O_2$ -affinity, which presumably facilitates  $O_2$  release at the cellular level (Krogh & Leitch, 1919), both in more active fishes (like trout) and in nonactive fishes (like dogfish) living in nonhypoxic environments where there is no problem of  $O_2$  uptake. However, the principle of an oxygenation status that is independent of  $P_{iO_2}$  over a wide range must remain valid in steady states, either at rest or at a given level of activity. This latter point is illustrated by data from Garey & Rahn (1970), who measured  $P_{O_2}$  in gas pockets of *Salmo gairdneri* swimming freely in a fishery (Fig. 6A). The fishery was supplied by a river with a high photosynthetic rate. In these conditions, although  $P_{iO_2}$  varied between 30 and 6 kPa and temperature between 8 and 17°C,  $P_{O_2}$  in the gas pockets (which is a closed estimate of  $P_{O_2}$  in the surrounding tissues and the venous blood draining them, Rahn, 1957; Piiper, 1965) was independent of  $P_{iO_2}$ . Trout can live perfectly well in poorly oxygenated waters. In eastern France we found a population of *Salmo trutta fario* living in the spring of a river in which the year-round  $P_{iO_2}$  is about 6–7 kPa at  $10.0 \pm 0.2^\circ\text{C}$  (Massabuau & Fritz, 1984). Ott *et al.* (1980) reported that *Salmo gairdneri* can maintain its resting  $\dot{M}_{O_2}$  constant down to 2–3 kPa, independently of the temperature between 10 and 20°C. Fig. 6B shows data redrawn from Lomholt & Johansen (1979) which corroborate our results on  $PE_{O_2}$ . These authors measured oxygen extraction coefficients in carp exposed to hypoxia. We recalculated the original  $PE_{O_2}$  values from their results. It is clear that they remain in a narrow range, although the mean tends to increase slightly with

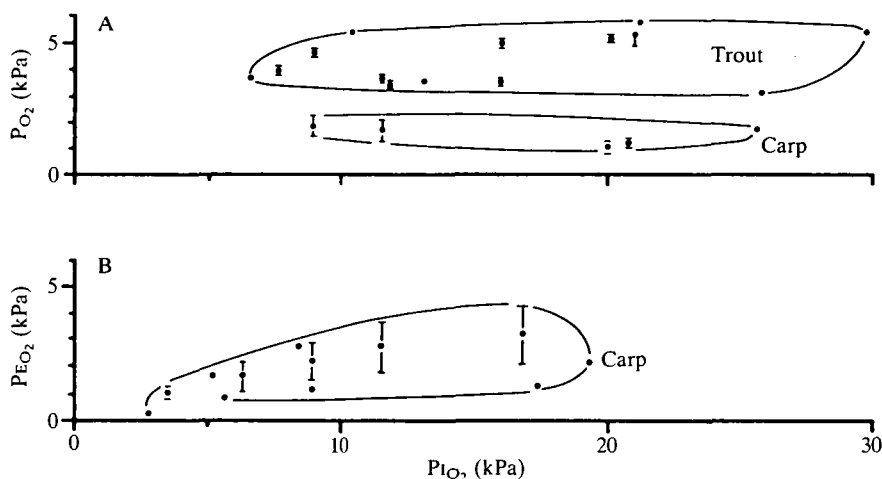

Fig. 6. (A) Changes of  $O_2$  partial pressure,  $P_{O_2}$ , in gas pockets of trout and carp freely swimming in a fishery where the inspired  $P_{O_2}$ ,  $P_{I_{O_2}}$ , varied spontaneously from about 30 to 6 kPa during daytime (redrawn from Garey & Rahn, 1970). The gas pocket  $P_{O_2}$  was independent of  $P_{I_{O_2}}$ . (B) Changes of  $O_2$  partial pressure in the expired water,  $P_{E_{O_2}}$ , of carp exposed to various  $P_{I_{O_2}}$  values (redrawn from Lomholt & Johansen, 1979; see text). Means  $\pm$  1 s.e.

$P_{I_{O_2}}$ . This is because of the use of an arithmetic mean for a probably non-normal distribution (see Fig. 4 in present paper and fig. 6 in Massabuau & Burtin, 1984). These results are consistent with the constancy of  $P_{O_2}$  in carp gas pockets (Fig. 6A; Garey & Rahn, 1970) and data from Garey (1967), Eddy (1974) and Itazawa & Takeda (1978), who showed that changes of  $P_{I_{O_2}}$  between 3–3.5 and 20 kPa did not alter the lowest measured  $P_{a_{O_2}}$  values in carp and tench.

In the teleost gill, the countercurrent model is generally accepted to describe the functioning of the gas exchanger (Hughes, 1984). In a system of this type, complete equilibration between inspired water and arterial blood and between expired water and venous blood is theoretically possible. In *Silurus* at rest, at least at the highest  $P_{I_{O_2}}$ , our present results show that equilibration between  $P_{I_{O_2}}$  and  $P_{a_{O_2}}$  is far from complete, whereas  $P_{E_{O_2}}$  is close to  $P_{\bar{v}_{O_2}}$  (Fig. 5A). Although the latter suggests that diffusion limitation must be very low, the former shows that gas exchange is ventilation-limited (Piiper & Scheid, 1984). The functional basis of this limitation can be attributed to a mismatch between ventilatory and perfusive conductance at all studied  $P_{I_{O_2}}$  values (Table 2). This is in agreement with the general strategy of *Silurus* in hypoxia, which is based exclusively on the reduction of this ventilatory limitation. Some lamellae are likely not to be ventilated at rest but only perfused. This would lead to the equivalent of a 'mismatch blood shunt' (Piiper & Scheid, 1984). True shunt bypassing of the gills has not been described in teleosts (Dunel & Laurent, 1980). The magnitude of the shunt,  $S_b$ , can be estimated from the ratio  $(P_I - P_a)/(P_I - P_{\bar{v}})$ , which is the amplitude of the non-equilibration divided by the  $P_{O_2}$  difference between inspired water and venous

blood. In normoxia  $S_b$  was 0.9 (Table 2). The decrease of  $S_b$  with hypoxia may correspond to an increase in the number of ventilated lamellae. These changes in ventilation-perfusion inhomogeneities affect gas exchange so that  $P_{E_{O_2}}$  can be either lower or higher than  $P_{a_{O_2}}$  or equal to it (see Piiper & Scheid, 1984, for a theoretical analysis). However, this type of observation, based on small  $P_{E_{O_2}}$  changes, must be considered with caution as there are several uncertainties in our  $P_{E_{O_2}}$  measurements (this is also valid for all the calculated variables in Table 2 where  $P_{E_{O_2}}$  has been used). First, although we can be confident in our blood sampling from carefully chosen vessels, this is not true of our sampling of expired water. A perfectly defined channel exists only in a few species. Some problems of expired water mixing or contamination by backward gas diffusion may exist in *Silurus*, despite the anatomical arrangement of the branchial cavity (Fig. 1). Second, given the variability of  $P_{E_{O_2}}$  (Figs 3 and 4), we chose the modal value as representing the actual value. Although the modal value is satisfactory in a study of a controlled system, it introduces a bias in the analysis of the overall gas exchanges. Indeed, all the water passing over the gills participates in the gas exchanges. The modal value clearly underestimates (at least at the highest  $P_{I_{O_2}}$ ) the ideal measurement that would be performed on all the collected and mixed expired water.

#### *Changes in acid-base balance*

When  $P_{I_{O_2}}$  varied,  $P_{a_{CO_2}}$  changed as a consequence of the ventilatory adaptation. In *Silurus* this led either to a hypocapnic alkalosis or a hypercapnic acidosis, which were fully compensated within 1 day. This was achieved by metabolic means but also possibly – in the hyperoxic direction – by transient ventilatory adjustments that are likely to occur in dogfish exposed to hyperoxia (Heisler *et al.* 1988). Burtin *et al.* (1986) demonstrated that  $\dot{V}_w$  can participate in regulation of acid-base balance in water-breathers.

#### *In conclusion*

In the teleost *S. glanis*, as in the crayfish *A. leptodactylus*,  $\dot{V}_w$  plays a key role in maintaining resting  $\dot{M}_{O_2}$  constant while  $P_{I_{O_2}}$  varies. The main result of the  $\dot{V}_w$  adaptation is that  $P_{a_{O_2}}$  remains constant in *Silurus* and in a narrow range in *Astacus*. Consequently, the homeostasis of the *milieu intérieur*, in terms of  $O_2$ , is fulfilled. But our data further show that the countercurrent arrangement of the fish gill is more efficient in achieving this result than is the crosscurrent design (Massabuau, 1983) of the crayfish gill. This has already been proposed on theoretical grounds by Piiper & Scheid (1984). Indeed, when  $P_{I_{O_2}}$  decreased from 40 to 3 kPa,  $P_{a_{O_2}}$  decreased slightly in crayfish (see Introduction), as to be expected in a crosscurrent system maintaining constant  $P_{E_{O_2}}$ . Also, a Bohr effect appeared at  $P_{I_{O_2}}$  values below 10 kPa and  $\dot{V}_b$  was increased at 3.3 kPa (Massabuau & Burtin, 1984; Sakakibara *et al.* 1987). In *S. glanis* in the same  $P_{I_{O_2}}$  range,  $P_{a_{O_2}}$  stays constant. There is no Bohr effect and no  $\dot{V}_b$  increase.  $O_2$  supply is maintained simply by ventilatory adjustments.

The authors wish to thank Dr D. C. Jackson for help in preparing the English manuscript and E. Pionnier for the kind supply of *Silurus*. The experiments were partially financed by funds of the programme PIREN-Eau/Alsace (CNRS) and Dr B. Burtin was supported by the Ministère de la Recherche et de la Technologie.

### References

- ALBERS, C., GOTZ, K. H. & WELBERS, P. (1981). Oxygen transport and acid-base balance in the blood of the sheatfish, *Silurus glanis*. *Respir. Physiol.* **46**, 223–236.
- BAMFORD, O. S. (1974). Oxygen reception in the rainbow trout (*Salmo gairdneri*). *Comp. Biochem. Physiol.* **48A**, 69–76.
- BAUMGARTEN-SCHUMANN, D. & PIPER, J. (1968). Gas exchange in the gills of resting unanesthetized dogfish (*Scyliorhinus stellaris*). *Respir. Physiol.* **5**, 317–325.
- BOUVEROT, P. (1985). *Adaptation to Altitude-Hypoxia in Vertebrates*. Berlin, Heidelberg, New York, Tokyo: Springer-Verlag. 176pp.
- BURTIN, B., MASSABUAU, J. C. & DEJOURS, P. (1986). Ventilatory regulation of extracellular pH in crayfish exposed to changes in water titration alkalinity and NaCl concentration. *Respir. Physiol.* **65**, 235–243.
- BUTLER, P. & TAYLOR, E. W. (1975). The effect of progressive hypoxia on respiration in the dogfish (*Scyliorhinus canicula*) at different seasonal temperatures. *J. exp. Biol.* **63**, 117–130.
- CAMERON, J. N. (1971). Rapid method for determination of total carbon dioxide in small samples. *J. appl. Physiol.* **31**, 632–634.
- DEJOURS, P. (1981). *Principles of Comparative Respiratory Physiology*. Amsterdam, New York, Oxford: Elsevier. 265pp.
- DEJOURS, P. (1988). *Respiration in Water and Air*. Amsterdam, New York, Oxford: Elsevier. 179pp.
- DEJOURS, P., ARMAND, J. & GENDNER, J. P. (1978). Importance de la régulation de l'équilibre acide-base de l'eau ambiante pour l'étude des échanges respiratoires et ioniques des animaux aquatiques. *C. r. hebd. Séanc. Acad. Sci., Paris* **287**, 1397–1399.
- DUNEL, S. & LAURENT, P. (1980). Functional organisation of the gill vasculature in different classes of fish. In *Epithelial Transport in the Lower Vertebrates* (ed. B. Lahlou), pp. 37–58. Cambridge, London, New York: Cambridge University Press.
- ECLANCHER, B. (1972). Action des changements rapides de  $P_{O_2}$  de l'eau sur la ventilation de la truite et de la tanche. *J. Physiol., Paris* **65**, 65A.
- ECLANCHER, B. (1975). Contrôle de la respiration chez les poissons téléostéens: réactions respiratoires à des changements rectangulaires de l'oxygénation du milieu. *C. r. hebd. Séanc. Acad. Sci., Paris* **280**, 307–310.
- ECLANCHER, B. & DEJOURS, P. (1975). Contrôle de la respiration chez les poissons téléostéens: existence de chémorécepteurs physiologiquement analogues aux chémorécepteurs des vertébrés supérieurs. *C. r. hebd. Séanc. Acad. Sci., Paris* **280**, 451–453.
- EDDY, F. B. (1974). Blood gases of the tench (*Tinca tinca*) in well aerated and oxygen-deficient waters. *J. exp. Biol.* **60**, 71–83.
- GAREY, W. F. (1967). Gas exchange, cardiac output and blood pressure in free swimming carp (*Cyprinus carpio*). Dissertation, State University of New York at Buffalo, Buffalo, NY.
- GAREY, W. F. & RAHN, H. (1970). Gas tensions in tissues of trout and carp exposed to diurnal changes in oxygen tension of the water. *J. exp. Biol.* **52**, 575–582.
- HAWS, T. G. & GOODNIGHT, C. J. (1962). Some aspects of the hematology of two species of catfish in relation to their habitats. *Physiol. Zool.* **25**, 8–17.
- HEISLER, N., TOEWS, D. P. & HOLETON, G. F. (1988). Regulation of ventilation and acid-base status in the elasmobranch *Scyliorhinus stellaris* during hyperoxia-induced hypercapnia. *Respir. Physiol.* **71**, 227–246.
- HUGHES, G. M. (1984). General anatomy of the gills. In *Fish Physiology*, vol. XA (ed. W. S. Hoar & D. J. Randall), pp. 1–72. New York: Academic Press.
- ITAZAWA, Y. & TAKEDA, T. (1978). Gas exchange in the carp gills in normoxic and hypoxic conditions. *Respir. Physiol.* **35**, 263–269.

- JONES, D. P. & KENNEDY, F. G. (1982). Intracellular oxygen supply during hypoxia. *Am. J. Physiol.* **243**, C247–C253.
- KIRSCH, R. & NONNOTTE, G. (1977). Cutaneous respiration in three freshwater teleosts. *Respir. Physiol.* **29**, 339–354.
- KROGH, A. & LEITCH, I. (1919). The respiratory function of the blood in fishes. *J. Physiol., Lond.* **52**, 288–300.
- LOMHOLT, J. P. & JOHANSEN, K. (1979). Hypoxia acclimation in carp: How it affects  $O_2$  uptake, ventilation, and  $O_2$  extraction from water. *Physiol. Zool.* **52**, 38–49.
- MALTE, H. & WEBER, R. E. (1987). The effect of shape and position of the oxygen equilibrium curve on extraction and ventilation requirement in fishes. *Respir. Physiol.* **70**, 221–228.
- MASSABUAU, J. C. (1983). The gas exchanger of the crayfish: A crosscurrent system. *J. Physiol., Lond.* **345**, 170P.
- MASSABUAU, J. C. & BURTIN, B. (1984). Regulation of oxygen consumption in the crayfish *Astacus leptodactylus* at different levels of oxygenation: role of peripheral  $O_2$  chemoreception. *J. comp. Physiol.* **155B**, 43–49.
- MASSABUAU, J. C., DEJOURS, P. & SAKAKIBARA, Y. (1984). Ventilatory  $CO_2$  drive in the crayfish: influence of oxygen consumption and water oxygenation. *J. comp. Physiol.* **154B**, 65–72.
- MASSABUAU, J. C. & FRITZ, B. (1984). Respiratory gas concentration ( $O_2$  and  $CO_2$ ) and ionic composition of river water in the Alsatian plain (East France). In *Hydrochemical Balances of Freshwater Systems* (ed. E. Eriksson), **150**, 107–115.
- MILSOM, K. & BRILL, R. W. (1986). Oxygen sensitive afferent information arising from the first gill arch of yellowfin tuna. *Respir. Physiol.* **66**, 193–203.
- MUUS, B. & DAHLSTROM, P. (1978). *Freshwater Fishes of Britain and Europe*. London: Collins. 222pp.
- NONNOTTE, G. (1981). Cutaneous respiration in six freshwater teleosts. *Comp. Biochem. Physiol.* **70A**, 541–543.
- OTT, M. E., HEISLER, N. & ULTSCH, G. R. (1980). A re-evaluation of the relationship between temperature and the critical oxygen tension in freshwater fishes. *Comp. Biochem. Physiol.* **67A**, 337–340.
- PIPER, J. (1965). Physiological equilibria of gas cavities in the body. In *Handbook of Physiology*, section 3, *Respiration*, vol. II (ed. W. O. Fenn & H. Rahn), pp. 1205–1218. Washington: American Physiological Society.
- PIPER, J. & SCHEID, P. (1984). Model analysis of gas transfer in fish gills. In *Fish Physiology*, vol. XA (ed. W. S. Hoar & D. J. Randall), pp. 229–262. New York: Academic Press.
- RAHN, H. (1957). Gasometric method for measurement of tissue oxygen tension. *Fedn Proc. Fedn Am. Socs exp. Biol.* **16**, 685–688.
- ROUGHTON, F. J. W. (1964). Transport of oxygen and carbon dioxide. In *Handbook of Physiology*, section 3, *Respiration*, vol. I (ed. W. O. Fenn & H. Rahn), pp. 767–826. Washington: American Physiological Society.
- SAKAKIBARA, Y., BURTIN, B. & MASSABUAU, J. C. (1987). Circadian rhythm of extracellular pH in crayfish at different levels of oxygenation. *Respir. Physiol.* **69**, 359–367.
- SAUNDERS, R. L. (1962). The irrigation of the gill in fishes. II. Efficiency of oxygen uptake in relation to respiratory flow activity and concentrations of oxygen and carbon dioxide. *Can. J. Zool.* **40**, 817–862.
- SHELTON, G., JONES, D. R. & MILSOM, W. K. (1986). Control of breathing in ectothermic vertebrates. In *Handbook of Physiology*, section 3, *The Respiratory System*, vol. II, *Control of Breathing* (ed. P. T. Macklem & J. Mead), pp. 857–909. Bethesda, MD, Am. Physiol. Soc. Distributed by the Williams & Wilkins Company, Baltimore, MD.
- STEEN, J. B. & KRUYSSSE, A. (1964). The respiratory function of teleostean gills. *Comp. Biochem. Physiol.* **12**, 127–142.
- TUCKER, V. A. (1967). Method for oxygen content and dissociation curves on microliter blood samples. *J. appl. Physiol.* **23**, 410–414.
- YAMAMOTO, K.-I., ITAZAWA, Y. & KOBAYASHI, H. (1980). Supply of erythrocytes into the circulating blood from the spleen of exercised fish. *Comp. Biochem. Physiol.* **65A**, 5–11.
